# Supplementary material
Source: Elsevier journal article supplement (https://rcastoragev2.blob.core.windows.net/c8460cc8f74a097642a8463fefd701a5/mmc1.pdf)
Supplement: mmc1 [file mmc1.pdf]

## Supplemental Data

### Chronic Palmitate Exposure Inhibits

### Insulin Secretion by Dissociation

### of $\text{Ca}^{2+}$ Channels from Secretory Granules

Michael B. Hoppa, Stephan Collins, Reshma Ramracheya,  
Leanne Hodson, Stefan Amisten, Quan Zhang, Paul Johnson,  
Frances M. Ashcroft, and Patrik Rorsman

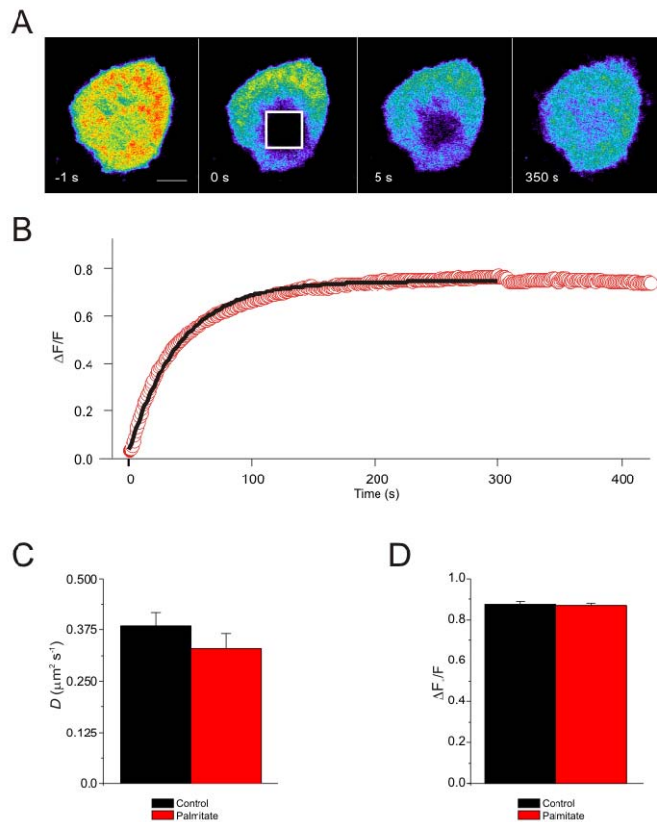

Figure S1. **No effect of palmitate treatment on membrane fluidity.** **A)** Confocal images of the footprint of a BODIPY-labeled  $\beta$ -cell before (-1 s), just after photobleaching (0) and following 5 and 350 s of fluorescence recovery. The time-

dependent recovery of  $\Delta F/F$  observed reflects movement of the fluorophores into the bleached area from the surrounding unbleached region. The photobleached area is indicated by the white square (5 x 5  $\mu\text{m}$ ). **B)** Average fluorescence recovery time courses for a representative palmitate-treated cell. **C-D)** Diffusion coefficient (D) and mobile fraction ( $\Delta F/F$ ) measured in control (n=20, black) and palmitate-treated (n=20, red) cells. The values of  $\Delta F/F$  (P=0.35) and D (P=0.31) were not different in control and palmitate-treated cells.

**Methods:** FRAP (fluorescence recovery after photobleaching) experiments were performed at room temperature utilizing the FRAP protocol of the Zeiss LSM 510 Meta Imaging system with excitation from a 488 nm argon gas laser and emitted collected through a GFP filter set. BODIPY 4,4 difluoro-5-methyl-4-bora-3a, 4a-diaza-s-inda-dodecanoic acid (Invitrogen, USA) was prepared as a 100x concentrated stock solution in DMSO. Cells were labelled with 1  $\mu\text{M}$  of the fluorophore in serum-free OPTIMEM medium (Invitrogen) at 37°C for 5 min. They were then superfused for 10 min with solution containing (mM) 138 NaCl, 5.6 KCl, 2.6  $\text{CaCl}_2$ , 1.2  $\text{MgCl}_2$ , 5 HEPES and 5 D-glucose to remove excess BODIPY. The rate of fluorescence recovery was fit using a single exponential calculated with the Back Multiplication Method using freeware written by Kota Miura (Centre for Molecular and Cellular Imaging, EMBL Heidelberg, Germany).

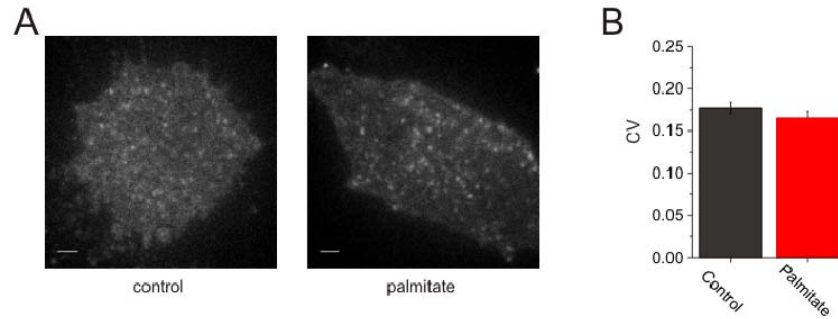

Figure S2. **A-B)** Evanescent-field illumination of  $\beta$ -cells cultured under control conditions (A) or in the presence of palmitate for 72 h (B) were blocked in 5% goat serum for 1 h and then immunostained with an antibody against syntaxin-1 (product # 110 011 from Synaptic Systems, Germany) for 2 h at room temperature followed by a 3x wash in PBS. Syntaxin-1 immunoreactivity was visualized using a goat anti-mouse secondary antibody (Vector Laboratories, California USA). Scale bar = 1.5  $\mu$ m. **C)** Coefficient of variation for syntaxin-1 distribution in control (black; n=9) and palmitate-treated  $\beta$ -cells (red; n=7),  $P>0.05$ .

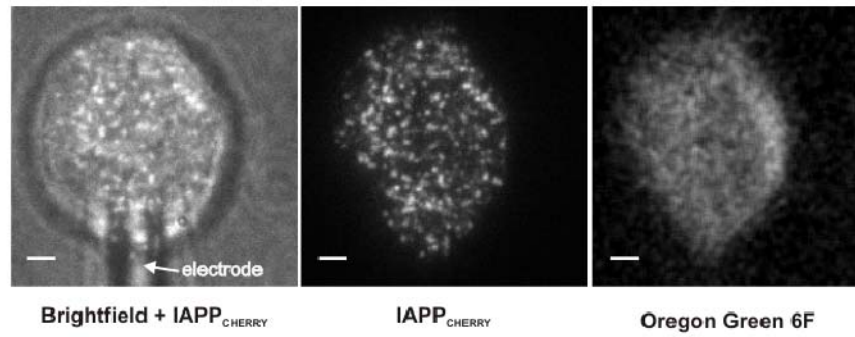

Figure S3. **TIRF imaging of  $\text{Ca}^{2+}$  and IAPP in a patch-clamped  $\beta$ -cell.** (Left) A voltage-clamped mouse  $\beta$ -cell under brightfield illumination (the laser was turned on to allow visualization of the tagged granules). (Middle) IAPP-mCherry labeled vesicles. (Right)  $[\text{Ca}^{2+}]_i$  measured using Oregon Green 6F. Scale bar: 2  $\mu\text{m}$ .

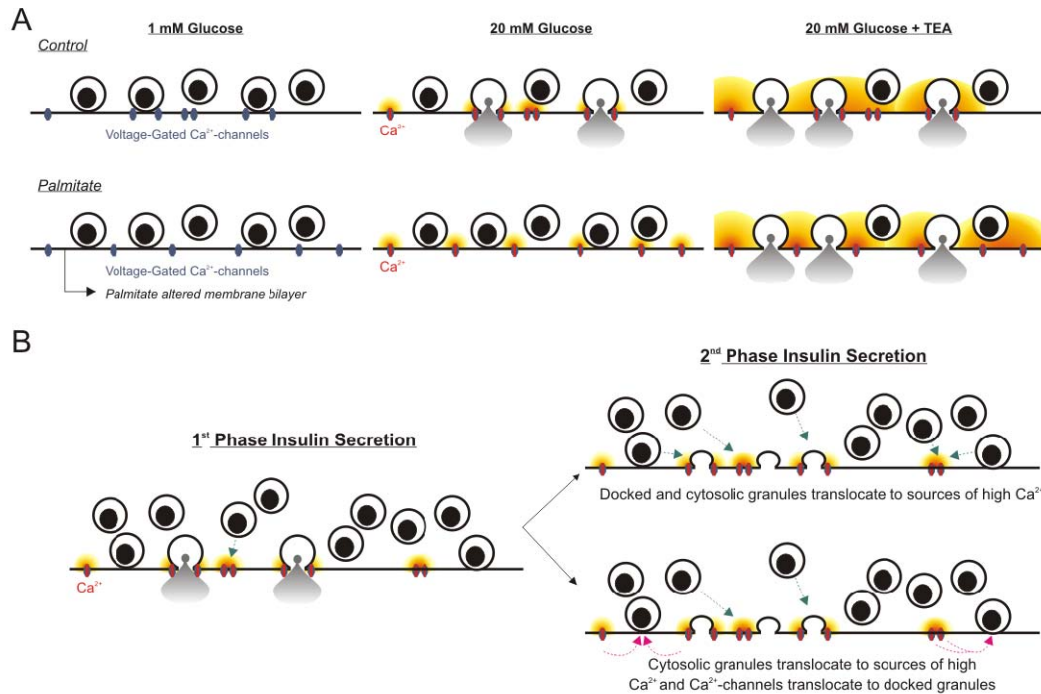

**Figure S4. Dissociation of docked granules and microdomains of  $\text{Ca}^{2+}$  influx.** **A)** Schematic of the arrangement of  $\text{Ca}^{2+}$ -channels and granules at the plasma membrane in control and palmitate-treated  $\beta$ -cells. Under physiological stimulation action potentials briefly open voltage-gated channels and only granules docked close to  $\text{Ca}^{2+}$  microdomains that arise during  $\text{Ca}^{2+}$ -channel opening undergo exocytosis. The impaired coupling between docked granules and  $\text{Ca}^{2+}$ -channels in palmitate treated cells impairs exocytosis. TEA-induced prolongation of the action potential expands the  $\text{Ca}^{2+}$ -microdomains and tight association of  $\text{Ca}^{2+}$ -influx and the secretory granules is no longer crucial for insulin secretion to occur. **B)** Relationship between  $\text{Ca}^{2+}$ -channels and secretory granules during 1<sup>st</sup> and 2<sup>nd</sup> phase insulin secretion. During 1<sup>st</sup> phase insulin secretion, granules situated close to the  $\text{Ca}^{2+}$ -channels (RRP) undergo exocytosis. Depletion of RRP results in the end of 1<sup>st</sup> phase secretion. During 2<sup>nd</sup> phase insulin secretion, new cytosolic granules as well as docked granules are recruited to the release

sites (top). Alternatively, not only are cytosolic granules recruited to sources of high  $\text{Ca}^{2+}$ , but also the  $\text{Ca}^{2+}$ -channels move laterally within the plasma membrane to docked granules that were previously situated too far away from the points of  $\text{Ca}^{2+}$ -entry to undergo exocytosis (bottom). Thus, both 1<sup>st</sup> and 2<sup>nd</sup> phase insulin secretion requires a tight association between the  $\text{Ca}^{2+}$ -channels and the secretory granules. 2<sup>nd</sup> phase secretion will proceed at a lower rate than 1<sup>st</sup> phase secretion because lateral movement and/or recruitment of new granules occurs at a lower rate than the maximum secretory rate.

|                |                                                    |            |
|----------------|----------------------------------------------------|------------|
| <i>Snap25</i>  | synaptosome-associated protein of 25,000 daltons   | 1.29±0.15  |
| <i>Syt7</i>    | synaptotagmin 7                                    | 1.57±0.32  |
| <i>Syt9</i>    | synaptotagmin 9                                    | 1.19±0.47  |
| <i>Unc13b</i>  | munc 13b                                           | 1.31±0.27  |
| <i>Rim2</i>    | Rim 2                                              | 1.18±0.16  |
| <i>Cpx1</i>    | Complexin 1                                        | 0.91±0.35  |
| <i>Syt4</i>    | Granuphilin                                        | 0.71±0.11* |
| <i>Rab3a</i>   | Rabphilin 3a                                       | 1.21±0.28  |
| <i>Rab27a</i>  | Rabphilin 27a                                      | 0.96±0.11  |
| <i>Bsn</i>     | Bassoon                                            | 1.04±0.22  |
| <i>Cacna1c</i> | L-type Ca <sup>2+</sup> -channel $\alpha$ -subunit | 0.96±0.13  |
| <i>Cacnb2</i>  | L-type Ca <sup>2+</sup> -channel $\beta$ -subunit  | 0.93±0.08  |
| <i>Cacnb3</i>  | L-type Ca <sup>2+</sup> -channel $\beta$ -subunit  | 1.17±0.17  |
| <i>Tcf7l2</i>  | transcription factor 7-like 2 gene                 | 1.23±0.26  |

Table S1. **Expression of genes associated with exocytosis in control and palmitate-treated mouse pancreatic islets.** Gene expression data relative to GAPDH from control and palmitate-treated islets. Gene expression has been normalised to control (=100%) for nine paired experiments (each experiments based on islets from the same animal). \* $P < 0.05$ . Additional genes that were previously analyzed (Olofsson et al., 2007) and found not to change in response to palmitate exposure to have no significant correlation but not shown include Chgb, Cpt1, Ins1 and Stx1a. For all measurements, the total mouse islet RNA was purified, transcribed into cDNA and used as template for qPCR using QuantiTect primer Assays and QuantiFastqPCR enzyme (Qiagen, Venlo, the Netherlands).
